# Supplementary material for: Identification of evolutionarily conserved virulence factor by selective pressure analysis of Streptococcus pneumoniae
Source: PubMed Central journal article supplement (PMC6408437; doi:10.1038/s42003-019-0340-7), 2019-03-08
Supplement: 42003_2019_340_MOESM1_ESM.pdf [file 42003_2019_340_MOESM1_ESM.pdf]

## Reporting Summary

Nature Research wishes to improve the reproducibility of the work that we publish. This form provides structure for consistency and transparency in reporting. For further information on Nature Research policies, see [Authors & Referees](#) and the [Editorial Policy Checklist](#).

### Statistics

For all statistical analyses, confirm that the following items are present in the figure legend, table legend, main text, or Methods section.

n/a Confirmed

- The exact sample size ( $n$ ) for each experimental group/condition, given as a discrete number and unit of measurement
- A statement on whether measurements were taken from distinct samples or whether the same sample was measured repeatedly
- The statistical test(s) used AND whether they are one- or two-sided  
*Only common tests should be described solely by name; describe more complex techniques in the Methods section.*
- A description of all covariates tested
- A description of any assumptions or corrections, such as tests of normality and adjustment for multiple comparisons
- A full description of the statistical parameters including central tendency (e.g. means) or other basic estimates (e.g. regression coefficient) AND variation (e.g. standard deviation) or associated estimates of uncertainty (e.g. confidence intervals)
- For null hypothesis testing, the test statistic (e.g.  $F$ ,  $t$ ,  $r$ ) with confidence intervals, effect sizes, degrees of freedom and  $P$  value noted  
*Give  $P$  values as exact values whenever suitable.*
- For Bayesian analysis, information on the choice of priors and Markov chain Monte Carlo settings
- For hierarchical and complex designs, identification of the appropriate level for tests and full reporting of outcomes
- Estimates of effect sizes (e.g. Cohen's  $d$ , Pearson's  $r$ ), indicating how they were calculated

*Our web collection on [statistics for biologists](#) contains articles on many of the points above.*

### Software and code

Policy information about [availability of computer code](#)

Data collection

tBLASTn function of NCBI BLAST

Data analysis

FGENESB (Bacterial Operon and Gene Prediction) and BPROM: <http://www.softberry.com/berry.phtml?topic=index&group=programs&subgroup=gfindb>  
 Phylogears2 and Kakusan4: <https://www.fifthdimension.jp/>  
 MAFFT v.7.221: <https://mafft.cbrc.jp/alignment/software/>  
 Jalview v.2.9.0b2: <http://www.jalview.org/>  
 MrBayes v.3.2.5: <http://mrbayes.sourceforge.net/>  
 RAxML v.8.1.20: <https://sco.h-its.org/exelixis/software.html>  
 FigTree v.1.4.2: <http://tree.bio.ed.ac.uk/software/figtree/>  
 HyPhy software v.2.220150316beta(MP) for MacOS(Universal binary): <http://www.hyphy.org/>  
 Prism v6.0h & v.7.0d software (Graphpad software)  
 MOTIF search: <https://www.genome.jp/tools/motif/>  
 DMFit program: <https://www.combase.cc>

For manuscripts utilizing custom algorithms or software that are central to the research but not yet described in published literature, software must be made available to editors/reviewers. We strongly encourage code deposition in a community repository (e.g. GitHub). See the Nature Research [guidelines for submitting code & software](#) for further information.

## Data

Policy information about [availability of data](#)

All manuscripts must include a [data availability statement](#). This statement should provide the following information, where applicable:

- Accession codes, unique identifiers, or web links for publicly available datasets
- A list of figures that have associated raw data
- A description of any restrictions on data availability

There are no restrictions on data availability. Accession codes are provided in this paper.

## Field-specific reporting

Please select the one below that is the best fit for your research. If you are not sure, read the appropriate sections before making your selection.

Life sciences  Behavioural & social sciences  Ecological, evolutionary & environmental sciences

For a reference copy of the document with all sections, see [nature.com/documents/nr-reporting-summary-flat.pdf](https://www.nature.com/documents/nr-reporting-summary-flat.pdf)

## Life sciences study design

All studies must disclose on these points even when the disclosure is negative.

|                 |                                                                                                                                                                                                                                                                                                                                                                                                           |
|-----------------|-----------------------------------------------------------------------------------------------------------------------------------------------------------------------------------------------------------------------------------------------------------------------------------------------------------------------------------------------------------------------------------------------------------|
| Sample size     | Sample size was determined following preliminary experiments in order to limit mice number in agreement with the rules of the local ethic committee on animal experimentations. Experimental size numbers were based on previous experiments (Yamaguchi M. et al. Sci. Rep. 2016, Henningham A. et al. J. Biol. Chem. 2014, Mori Y. et al. J. Biol. Chem. 2012, Yamaguchi M. et al. J. Biol. Chem. 2008). |
| Data exclusions | In quantitative PCR, one well was omitted. It is because the well was shown as an outlier by the PCR system, STEPOne program.                                                                                                                                                                                                                                                                             |
| Replication     | Data from human primary cells, cell lines, and in vivo experiments were generated using at least three independent biological replicates and we showed the data in this manuscript from a representative experiment. Quantitative PCR data were pooled and normalised from three or four independent experiments, each performed in triplicate.                                                           |
| Randomization   | For in vivo experiments, mice were randomized matching for age, weight, and sex.                                                                                                                                                                                                                                                                                                                          |
| Blinding        | No blinding was performed in these experiments.                                                                                                                                                                                                                                                                                                                                                           |

## Reporting for specific materials, systems and methods

We require information from authors about some types of materials, experimental systems and methods used in many studies. Here, indicate whether each material, system or method listed is relevant to your study. If you are not sure if a list item applies to your research, read the appropriate section before selecting a response.

### Materials & experimental systems

| n/a                                 | Involved in the study                                           |
|-------------------------------------|-----------------------------------------------------------------|
| <input checked="" type="checkbox"/> | <input type="checkbox"/> Antibodies                             |
| <input type="checkbox"/>            | <input checked="" type="checkbox"/> Eukaryotic cell lines       |
| <input checked="" type="checkbox"/> | <input type="checkbox"/> Palaeontology                          |
| <input type="checkbox"/>            | <input checked="" type="checkbox"/> Animals and other organisms |
| <input type="checkbox"/>            | <input checked="" type="checkbox"/> Human research participants |
| <input checked="" type="checkbox"/> | <input type="checkbox"/> Clinical data                          |

### Methods

| n/a                                 | Involved in the study                           |
|-------------------------------------|-------------------------------------------------|
| <input checked="" type="checkbox"/> | <input type="checkbox"/> ChIP-seq               |
| <input checked="" type="checkbox"/> | <input type="checkbox"/> Flow cytometry         |
| <input checked="" type="checkbox"/> | <input type="checkbox"/> MRI-based neuroimaging |

## Eukaryotic cell lines

Policy information about [cell lines](#)

|                                                                   |                                                                                                                                                         |
|-------------------------------------------------------------------|---------------------------------------------------------------------------------------------------------------------------------------------------------|
| Cell line source(s)                                               | A549 (ATCC CCL-185) was obtained from RIKEN Cell Bank (Japan).                                                                                          |
| Authentication                                                    | Identity of the cells was frequently checked by their morphological features but has not been authenticated by the short tandem repeat (STR) profiling. |
| Mycoplasma contamination                                          | All cell lines were tested negative for mycoplasma contamination.                                                                                       |
| Commonly misidentified lines (See <a href="#">ICLAC</a> register) | No commonly misidentified cell lines were used.                                                                                                         |

## Animals and other organisms

Policy information about [studies involving animals](#); [ARRIVE guidelines](#) recommended for reporting animal research

|                         |                                                                                                                                                                                     |
|-------------------------|-------------------------------------------------------------------------------------------------------------------------------------------------------------------------------------|
| Laboratory animals      | Mouse, females, CD1, 6 weeks old                                                                                                                                                    |
| Wild animals            | This study did not involve wild animals.                                                                                                                                            |
| Field-collected samples | This study did not involve samples collected from the wild.                                                                                                                         |
| Ethics oversight        | All mouse experiments were conducted in accordance with animal protocols approved by the Animal Care and Use Committee of Osaka University Graduate School of Dentistry (28-002-0). |

Note that full information on the approval of the study protocol must also be provided in the manuscript.

## Human research participants

Policy information about [studies involving human research participants](#)

|                            |                                                                                                                                                                                                                                                                                                                                                      |
|----------------------------|------------------------------------------------------------------------------------------------------------------------------------------------------------------------------------------------------------------------------------------------------------------------------------------------------------------------------------------------------|
| Population characteristics | This study involves the use of human blood and neutrophils isolated from peripheral blood from healthy volunteers. Blood was collected via venopuncture from healthy donors after obtaining written, informed consent according to a protocol approved by the institutional review board of Osaka University Graduate School of Dentistry (H26-E43). |
| Recruitment                | Healthy donors were recruited in Osaka University Graduate School of Dentistry.                                                                                                                                                                                                                                                                      |
| Ethics oversight           | As described above, the protocol approved by the institutional review board of Osaka University Graduate School of Dentistry (H26-E43).                                                                                                                                                                                                              |

Note that full information on the approval of the study protocol must also be provided in the manuscript.
